# Supplementary material for: Fast matrix treatment of 3-D radiative transfer in vegetation canopies: SPARTACUS-Vegetation 1.1
Source: Copernicus journal article supplement (doi:10.5194/gmd-11-339-2018), 2018-01-23
Supplement: Supplementary file 1 [file gmd-11-339-2018-supplement.zip]

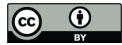

## *Supplement of*

# **Fast matrix treatment of 3-D radiative transfer in vegetation canopies: SPARTACUS-Vegetation 1.1**

**Robin J. Hogan et al.**

*Correspondence to:* Robin J. Hogan (r.j.hogan@ecmwf.int)

- gmd-11-339-2018-supplement-title-page.pdf
- spartacus\_vegetation-1.1
  - CHANGELOG
  - LICENSE
  - RAMI4PILPS
    - \* fabs\_RAMI4PILPSREF-OFC050\_BLK\_UNI\_NIR\_27.mes
    - \* fabs\_RAMI4PILPSREF-OFC050\_BLK\_UNI\_NIR\_60.mes
    - \* fabs\_RAMI4PILPSREF-OFC050\_BLK\_UNI\_NIR\_83.mes
    - \* fabs\_RAMI4PILPSREF-OFC050\_BLK\_UNI\_VIS\_27.mes
    - \* fabs\_RAMI4PILPSREF-OFC050\_BLK\_UNI\_VIS\_60.mes
    - \* fabs\_RAMI4PILPSREF-OFC050\_BLK\_UNI\_VIS\_83.mes
    - \* fabs\_RAMI4PILPSREF-OFC050\_MED\_UNI\_NIR\_27.mes
    - \* fabs\_RAMI4PILPSREF-OFC050\_MED\_UNI\_NIR\_60.mes
    - \* fabs\_RAMI4PILPSREF-OFC050\_MED\_UNI\_NIR\_83.mes
    - \* fabs\_RAMI4PILPSREF-OFC050\_MED\_UNI\_VIS\_27.mes
    - \* fabs\_RAMI4PILPSREF-OFC050\_MED\_UNI\_VIS\_60.mes
    - \* fabs\_RAMI4PILPSREF-OFC050\_MED\_UNI\_VIS\_83.mes
    - \* fabs\_RAMI4PILPSREF-OFC050\_SNW\_UNI\_NIR\_27.mes
    - \* fabs\_RAMI4PILPSREF-OFC050\_SNW\_UNI\_NIR\_60.mes
    - \* fabs\_RAMI4PILPSREF-OFC050\_SNW\_UNI\_NIR\_83.mes
    - \* fabs\_RAMI4PILPSREF-OFC050\_SNW\_UNI\_VIS\_27.mes
    - \* fabs\_RAMI4PILPSREF-OFC050\_SNW\_UNI\_VIS\_60.mes
    - \* fabs\_RAMI4PILPSREF-OFC050\_SNW\_UNI\_VIS\_83.mes
    - \* fabs\_RAMI4PILPSREF-OFC150\_BLK\_UNI\_NIR\_27.mes
    - \* fabs\_RAMI4PILPSREF-OFC150\_BLK\_UNI\_NIR\_60.mes
    - \* fabs\_RAMI4PILPSREF-OFC150\_BLK\_UNI\_NIR\_83.mes
    - \* fabs\_RAMI4PILPSREF-OFC150\_BLK\_UNI\_VIS\_27.mes

\* fabs\_RAMI4PILPSREF-OFC150\_BLK\_UNI\_VIS\_60.mes  
\* fabs\_RAMI4PILPSREF-OFC150\_BLK\_UNI\_VIS\_83.mes  
\* fabs\_RAMI4PILPSREF-OFC150\_MED\_UNI\_NIR\_27.mes  
\* fabs\_RAMI4PILPSREF-OFC150\_MED\_UNI\_NIR\_60.mes  
\* fabs\_RAMI4PILPSREF-OFC150\_MED\_UNI\_NIR\_83.mes  
\* fabs\_RAMI4PILPSREF-OFC150\_MED\_UNI\_VIS\_27.mes  
\* fabs\_RAMI4PILPSREF-OFC150\_MED\_UNI\_VIS\_60.mes  
\* fabs\_RAMI4PILPSREF-OFC150\_MED\_UNI\_VIS\_83.mes  
\* fabs\_RAMI4PILPSREF-OFC150\_SNW\_UNI\_NIR\_27.mes  
\* fabs\_RAMI4PILPSREF-OFC150\_SNW\_UNI\_NIR\_60.mes  
\* fabs\_RAMI4PILPSREF-OFC150\_SNW\_UNI\_NIR\_83.mes  
\* fabs\_RAMI4PILPSREF-OFC150\_SNW\_UNI\_VIS\_27.mes  
\* fabs\_RAMI4PILPSREF-OFC150\_SNW\_UNI\_VIS\_60.mes  
\* fabs\_RAMI4PILPSREF-OFC150\_SNW\_UNI\_VIS\_83.mes  
\* fabs\_RAMI4PILPSREF-OFC250\_BLK\_UNI\_NIR\_27.mes  
\* fabs\_RAMI4PILPSREF-OFC250\_BLK\_UNI\_NIR\_60.mes  
\* fabs\_RAMI4PILPSREF-OFC250\_BLK\_UNI\_NIR\_83.mes  
\* fabs\_RAMI4PILPSREF-OFC250\_BLK\_UNI\_VIS\_27.mes  
\* fabs\_RAMI4PILPSREF-OFC250\_BLK\_UNI\_VIS\_60.mes  
\* fabs\_RAMI4PILPSREF-OFC250\_BLK\_UNI\_VIS\_83.mes  
\* fabs\_RAMI4PILPSREF-OFC250\_MED\_UNI\_NIR\_27.mes  
\* fabs\_RAMI4PILPSREF-OFC250\_MED\_UNI\_NIR\_60.mes  
\* fabs\_RAMI4PILPSREF-OFC250\_MED\_UNI\_NIR\_83.mes  
\* fabs\_RAMI4PILPSREF-OFC250\_MED\_UNI\_VIS\_27.mes  
\* fabs\_RAMI4PILPSREF-OFC250\_MED\_UNI\_VIS\_60.mes  
\* fabs\_RAMI4PILPSREF-OFC250\_MED\_UNI\_VIS\_83.mes  
\* fabs\_RAMI4PILPSREF-OFC250\_SNW\_UNI\_NIR\_27.mes  
\* fabs\_RAMI4PILPSREF-OFC250\_SNW\_UNI\_NIR\_60.mes  
\* fabs\_RAMI4PILPSREF-OFC250\_SNW\_UNI\_NIR\_83.mes  
\* fabs\_RAMI4PILPSREF-OFC250\_SNW\_UNI\_VIS\_27.mes  
\* fabs\_RAMI4PILPSREF-OFC250\_SNW\_UNI\_VIS\_60.mes  
\* fabs\_RAMI4PILPSREF-OFC250\_SNW\_UNI\_VIS\_83.mes  
\* fabs\_RAMI4PILPSREF-SHR025\_BLK\_UNI\_NIR\_27.mes  
\* fabs\_RAMI4PILPSREF-SHR025\_BLK\_UNI\_NIR\_60.mes  
\* fabs\_RAMI4PILPSREF-SHR025\_BLK\_UNI\_NIR\_83.mes  
\* fabs\_RAMI4PILPSREF-SHR025\_BLK\_UNI\_VIS\_27.mes  
\* fabs\_RAMI4PILPSREF-SHR025\_BLK\_UNI\_VIS\_60.mes  
\* fabs\_RAMI4PILPSREF-SHR025\_BLK\_UNI\_VIS\_83.mes  
\* fabs\_RAMI4PILPSREF-SHR025\_MED\_UNI\_NIR\_27.mes  
\* fabs\_RAMI4PILPSREF-SHR025\_MED\_UNI\_NIR\_60.mes  
\* fabs\_RAMI4PILPSREF-SHR025\_MED\_UNI\_NIR\_83.mes  
\* fabs\_RAMI4PILPSREF-SHR025\_MED\_UNI\_VIS\_27.mes  
\* fabs\_RAMI4PILPSREF-SHR025\_MED\_UNI\_VIS\_60.mes  
\* fabs\_RAMI4PILPSREF-SHR025\_MED\_UNI\_VIS\_83.mes  
\* fabs\_RAMI4PILPSREF-SHR025\_SNW\_UNI\_NIR\_27.mes  
\* fabs\_RAMI4PILPSREF-SHR025\_SNW\_UNI\_NIR\_60.mes  
\* fabs\_RAMI4PILPSREF-SHR025\_SNW\_UNI\_NIR\_83.mes

\* fabs\_RAMI4PILPSREF-SHR025\_SNW\_UNI\_VIS\_27.mes  
\* fabs\_RAMI4PILPSREF-SHR025\_SNW\_UNI\_VIS\_60.mes  
\* fabs\_RAMI4PILPSREF-SHR025\_SNW\_UNI\_VIS\_83.mes  
\* fabs\_RAMI4PILPSREF-SHR050\_BLK\_UNI\_NIR\_27.mes  
\* fabs\_RAMI4PILPSREF-SHR050\_BLK\_UNI\_NIR\_60.mes  
\* fabs\_RAMI4PILPSREF-SHR050\_BLK\_UNI\_NIR\_83.mes  
\* fabs\_RAMI4PILPSREF-SHR050\_BLK\_UNI\_VIS\_27.mes  
\* fabs\_RAMI4PILPSREF-SHR050\_BLK\_UNI\_VIS\_60.mes  
\* fabs\_RAMI4PILPSREF-SHR050\_BLK\_UNI\_VIS\_83.mes  
\* fabs\_RAMI4PILPSREF-SHR050\_MED\_UNI\_NIR\_27.mes  
\* fabs\_RAMI4PILPSREF-SHR050\_MED\_UNI\_NIR\_60.mes  
\* fabs\_RAMI4PILPSREF-SHR050\_MED\_UNI\_NIR\_83.mes  
\* fabs\_RAMI4PILPSREF-SHR050\_MED\_UNI\_VIS\_27.mes  
\* fabs\_RAMI4PILPSREF-SHR050\_MED\_UNI\_VIS\_60.mes  
\* fabs\_RAMI4PILPSREF-SHR050\_MED\_UNI\_VIS\_83.mes  
\* fabs\_RAMI4PILPSREF-SHR050\_SNW\_UNI\_NIR\_27.mes  
\* fabs\_RAMI4PILPSREF-SHR050\_SNW\_UNI\_NIR\_60.mes  
\* fabs\_RAMI4PILPSREF-SHR050\_SNW\_UNI\_NIR\_83.mes  
\* fabs\_RAMI4PILPSREF-SHR050\_SNW\_UNI\_VIS\_27.mes  
\* fabs\_RAMI4PILPSREF-SHR050\_SNW\_UNI\_VIS\_60.mes  
\* fabs\_RAMI4PILPSREF-SHR050\_SNW\_UNI\_VIS\_83.mes  
\* fabs\_RAMI4PILPSREF-SHR100\_BLK\_UNI\_NIR\_27.mes  
\* fabs\_RAMI4PILPSREF-SHR100\_BLK\_UNI\_NIR\_60.mes  
\* fabs\_RAMI4PILPSREF-SHR100\_BLK\_UNI\_NIR\_83.mes  
\* fabs\_RAMI4PILPSREF-SHR100\_BLK\_UNI\_VIS\_27.mes  
\* fabs\_RAMI4PILPSREF-SHR100\_BLK\_UNI\_VIS\_60.mes  
\* fabs\_RAMI4PILPSREF-SHR100\_BLK\_UNI\_VIS\_83.mes  
\* fabs\_RAMI4PILPSREF-SHR100\_MED\_UNI\_NIR\_27.mes  
\* fabs\_RAMI4PILPSREF-SHR100\_MED\_UNI\_NIR\_60.mes  
\* fabs\_RAMI4PILPSREF-SHR100\_MED\_UNI\_NIR\_83.mes  
\* fabs\_RAMI4PILPSREF-SHR100\_MED\_UNI\_VIS\_27.mes  
\* fabs\_RAMI4PILPSREF-SHR100\_MED\_UNI\_VIS\_60.mes  
\* fabs\_RAMI4PILPSREF-SHR100\_MED\_UNI\_VIS\_83.mes  
\* fabs\_RAMI4PILPSREF-SHR100\_SNW\_UNI\_NIR\_27.mes  
\* fabs\_RAMI4PILPSREF-SHR100\_SNW\_UNI\_NIR\_60.mes  
\* fabs\_RAMI4PILPSREF-SHR100\_SNW\_UNI\_NIR\_83.mes  
\* fabs\_RAMI4PILPSREF-SHR100\_SNW\_UNI\_VIS\_27.mes  
\* fabs\_RAMI4PILPSREF-SHR100\_SNW\_UNI\_VIS\_60.mes  
\* fabs\_RAMI4PILPSREF-SHR100\_SNW\_UNI\_VIS\_83.mes  
\* fref\_RAMI4PILPSREF-OFC050\_BLK\_UNI\_NIR\_27.mes  
\* fref\_RAMI4PILPSREF-OFC050\_BLK\_UNI\_NIR\_60.mes  
\* fref\_RAMI4PILPSREF-OFC050\_BLK\_UNI\_NIR\_83.mes  
\* fref\_RAMI4PILPSREF-OFC050\_BLK\_UNI\_VIS\_27.mes  
\* fref\_RAMI4PILPSREF-OFC050\_BLK\_UNI\_VIS\_60.mes  
\* fref\_RAMI4PILPSREF-OFC050\_BLK\_UNI\_VIS\_83.mes  
\* fref\_RAMI4PILPSREF-OFC050\_MED\_UNI\_NIR\_27.mes  
\* fref\_RAMI4PILPSREF-OFC050\_MED\_UNI\_NIR\_60.mes

\* freq\_RAMI4PILPSREF-OFC050\_MED\_UNI\_NIR\_83.mes  
\* freq\_RAMI4PILPSREF-OFC050\_MED\_UNI\_VIS\_27.mes  
\* freq\_RAMI4PILPSREF-OFC050\_MED\_UNI\_VIS\_60.mes  
\* freq\_RAMI4PILPSREF-OFC050\_MED\_UNI\_VIS\_83.mes  
\* freq\_RAMI4PILPSREF-OFC050\_SNW\_UNI\_NIR\_27.mes  
\* freq\_RAMI4PILPSREF-OFC050\_SNW\_UNI\_NIR\_60.mes  
\* freq\_RAMI4PILPSREF-OFC050\_SNW\_UNI\_NIR\_83.mes  
\* freq\_RAMI4PILPSREF-OFC050\_SNW\_UNI\_VIS\_27.mes  
\* freq\_RAMI4PILPSREF-OFC050\_SNW\_UNI\_VIS\_60.mes  
\* freq\_RAMI4PILPSREF-OFC050\_SNW\_UNI\_VIS\_83.mes  
\* freq\_RAMI4PILPSREF-OFC150\_BLK\_UNI\_NIR\_27.mes  
\* freq\_RAMI4PILPSREF-OFC150\_BLK\_UNI\_NIR\_60.mes  
\* freq\_RAMI4PILPSREF-OFC150\_BLK\_UNI\_NIR\_83.mes  
\* freq\_RAMI4PILPSREF-OFC150\_BLK\_UNI\_VIS\_27.mes  
\* freq\_RAMI4PILPSREF-OFC150\_BLK\_UNI\_VIS\_60.mes  
\* freq\_RAMI4PILPSREF-OFC150\_BLK\_UNI\_VIS\_83.mes  
\* freq\_RAMI4PILPSREF-OFC150\_MED\_UNI\_NIR\_27.mes  
\* freq\_RAMI4PILPSREF-OFC150\_MED\_UNI\_NIR\_60.mes  
\* freq\_RAMI4PILPSREF-OFC150\_MED\_UNI\_NIR\_83.mes  
\* freq\_RAMI4PILPSREF-OFC150\_MED\_UNI\_VIS\_27.mes  
\* freq\_RAMI4PILPSREF-OFC150\_MED\_UNI\_VIS\_60.mes  
\* freq\_RAMI4PILPSREF-OFC150\_MED\_UNI\_VIS\_83.mes  
\* freq\_RAMI4PILPSREF-OFC150\_SNW\_UNI\_NIR\_27.mes  
\* freq\_RAMI4PILPSREF-OFC150\_SNW\_UNI\_NIR\_60.mes  
\* freq\_RAMI4PILPSREF-OFC150\_SNW\_UNI\_NIR\_83.mes  
\* freq\_RAMI4PILPSREF-OFC150\_SNW\_UNI\_VIS\_27.mes  
\* freq\_RAMI4PILPSREF-OFC150\_SNW\_UNI\_VIS\_60.mes  
\* freq\_RAMI4PILPSREF-OFC150\_SNW\_UNI\_VIS\_83.mes  
\* freq\_RAMI4PILPSREF-OFC250\_BLK\_UNI\_NIR\_27.mes  
\* freq\_RAMI4PILPSREF-OFC250\_BLK\_UNI\_NIR\_60.mes  
\* freq\_RAMI4PILPSREF-OFC250\_BLK\_UNI\_NIR\_83.mes  
\* freq\_RAMI4PILPSREF-OFC250\_BLK\_UNI\_VIS\_27.mes  
\* freq\_RAMI4PILPSREF-OFC250\_BLK\_UNI\_VIS\_60.mes  
\* freq\_RAMI4PILPSREF-OFC250\_BLK\_UNI\_VIS\_83.mes  
\* freq\_RAMI4PILPSREF-OFC250\_MED\_UNI\_NIR\_27.mes  
\* freq\_RAMI4PILPSREF-OFC250\_MED\_UNI\_NIR\_60.mes  
\* freq\_RAMI4PILPSREF-OFC250\_MED\_UNI\_NIR\_83.mes  
\* freq\_RAMI4PILPSREF-OFC250\_MED\_UNI\_VIS\_27.mes  
\* freq\_RAMI4PILPSREF-OFC250\_MED\_UNI\_VIS\_60.mes  
\* freq\_RAMI4PILPSREF-OFC250\_MED\_UNI\_VIS\_83.mes  
\* freq\_RAMI4PILPSREF-OFC250\_SNW\_UNI\_NIR\_27.mes  
\* freq\_RAMI4PILPSREF-OFC250\_SNW\_UNI\_NIR\_60.mes  
\* freq\_RAMI4PILPSREF-OFC250\_SNW\_UNI\_NIR\_83.mes  
\* freq\_RAMI4PILPSREF-OFC250\_SNW\_UNI\_VIS\_27.mes  
\* freq\_RAMI4PILPSREF-OFC250\_SNW\_UNI\_VIS\_60.mes  
\* freq\_RAMI4PILPSREF-OFC250\_SNW\_UNI\_VIS\_83.mes  
\* freq\_RAMI4PILPSREF-SHR025\_BLK\_UNI\_NIR\_27.mes

\* freq\_RAMI4PILPSREF-SHR025\_BLK\_UNI\_NIR\_60.mes  
\* freq\_RAMI4PILPSREF-SHR025\_BLK\_UNI\_NIR\_83.mes  
\* freq\_RAMI4PILPSREF-SHR025\_BLK\_UNI\_VIS\_27.mes  
\* freq\_RAMI4PILPSREF-SHR025\_BLK\_UNI\_VIS\_60.mes  
\* freq\_RAMI4PILPSREF-SHR025\_BLK\_UNI\_VIS\_83.mes  
\* freq\_RAMI4PILPSREF-SHR025\_MED\_UNI\_NIR\_27.mes  
\* freq\_RAMI4PILPSREF-SHR025\_MED\_UNI\_NIR\_60.mes  
\* freq\_RAMI4PILPSREF-SHR025\_MED\_UNI\_NIR\_83.mes  
\* freq\_RAMI4PILPSREF-SHR025\_MED\_UNI\_VIS\_27.mes  
\* freq\_RAMI4PILPSREF-SHR025\_MED\_UNI\_VIS\_60.mes  
\* freq\_RAMI4PILPSREF-SHR025\_MED\_UNI\_VIS\_83.mes  
\* freq\_RAMI4PILPSREF-SHR025\_SNW\_UNI\_NIR\_27.mes  
\* freq\_RAMI4PILPSREF-SHR025\_SNW\_UNI\_NIR\_60.mes  
\* freq\_RAMI4PILPSREF-SHR025\_SNW\_UNI\_NIR\_83.mes  
\* freq\_RAMI4PILPSREF-SHR025\_SNW\_UNI\_VIS\_27.mes  
\* freq\_RAMI4PILPSREF-SHR025\_SNW\_UNI\_VIS\_60.mes  
\* freq\_RAMI4PILPSREF-SHR025\_SNW\_UNI\_VIS\_83.mes  
\* freq\_RAMI4PILPSREF-SHR050\_BLK\_UNI\_NIR\_27.mes  
\* freq\_RAMI4PILPSREF-SHR050\_BLK\_UNI\_NIR\_60.mes  
\* freq\_RAMI4PILPSREF-SHR050\_BLK\_UNI\_NIR\_83.mes  
\* freq\_RAMI4PILPSREF-SHR050\_BLK\_UNI\_VIS\_27.mes  
\* freq\_RAMI4PILPSREF-SHR050\_BLK\_UNI\_VIS\_60.mes  
\* freq\_RAMI4PILPSREF-SHR050\_BLK\_UNI\_VIS\_83.mes  
\* freq\_RAMI4PILPSREF-SHR050\_MED\_UNI\_NIR\_27.mes  
\* freq\_RAMI4PILPSREF-SHR050\_MED\_UNI\_NIR\_60.mes  
\* freq\_RAMI4PILPSREF-SHR050\_MED\_UNI\_NIR\_83.mes  
\* freq\_RAMI4PILPSREF-SHR050\_MED\_UNI\_VIS\_27.mes  
\* freq\_RAMI4PILPSREF-SHR050\_MED\_UNI\_VIS\_60.mes  
\* freq\_RAMI4PILPSREF-SHR050\_MED\_UNI\_VIS\_83.mes  
\* freq\_RAMI4PILPSREF-SHR050\_SNW\_UNI\_NIR\_27.mes  
\* freq\_RAMI4PILPSREF-SHR050\_SNW\_UNI\_NIR\_60.mes  
\* freq\_RAMI4PILPSREF-SHR050\_SNW\_UNI\_NIR\_83.mes  
\* freq\_RAMI4PILPSREF-SHR050\_SNW\_UNI\_VIS\_27.mes  
\* freq\_RAMI4PILPSREF-SHR050\_SNW\_UNI\_VIS\_60.mes  
\* freq\_RAMI4PILPSREF-SHR050\_SNW\_UNI\_VIS\_83.mes  
\* freq\_RAMI4PILPSREF-SHR100\_BLK\_UNI\_NIR\_27.mes  
\* freq\_RAMI4PILPSREF-SHR100\_BLK\_UNI\_NIR\_60.mes  
\* freq\_RAMI4PILPSREF-SHR100\_BLK\_UNI\_NIR\_83.mes  
\* freq\_RAMI4PILPSREF-SHR100\_BLK\_UNI\_VIS\_27.mes  
\* freq\_RAMI4PILPSREF-SHR100\_BLK\_UNI\_VIS\_60.mes  
\* freq\_RAMI4PILPSREF-SHR100\_BLK\_UNI\_VIS\_83.mes  
\* freq\_RAMI4PILPSREF-SHR100\_MED\_UNI\_NIR\_27.mes  
\* freq\_RAMI4PILPSREF-SHR100\_MED\_UNI\_NIR\_60.mes  
\* freq\_RAMI4PILPSREF-SHR100\_MED\_UNI\_NIR\_83.mes  
\* freq\_RAMI4PILPSREF-SHR100\_MED\_UNI\_VIS\_27.mes  
\* freq\_RAMI4PILPSREF-SHR100\_MED\_UNI\_VIS\_60.mes  
\* freq\_RAMI4PILPSREF-SHR100\_MED\_UNI\_VIS\_83.mes

\* fref\_RAMI4PILPSREF-SHR100\_SNW\_UNI\_NIR\_27.mes  
\* fref\_RAMI4PILPSREF-SHR100\_SNW\_UNI\_NIR\_60.mes  
\* fref\_RAMI4PILPSREF-SHR100\_SNW\_UNI\_NIR\_83.mes  
\* fref\_RAMI4PILPSREF-SHR100\_SNW\_UNI\_VIS\_27.mes  
\* fref\_RAMI4PILPSREF-SHR100\_SNW\_UNI\_VIS\_60.mes  
\* fref\_RAMI4PILPSREF-SHR100\_SNW\_UNI\_VIS\_83.mes  
\* ftran\_RAMI4PILPSREF-OFC050\_BLK\_UNI\_NIR\_27.mes  
\* ftran\_RAMI4PILPSREF-OFC050\_BLK\_UNI\_NIR\_60.mes  
\* ftran\_RAMI4PILPSREF-OFC050\_BLK\_UNI\_NIR\_83.mes  
\* ftran\_RAMI4PILPSREF-OFC050\_BLK\_UNI\_VIS\_27.mes  
\* ftran\_RAMI4PILPSREF-OFC050\_BLK\_UNI\_VIS\_60.mes  
\* ftran\_RAMI4PILPSREF-OFC050\_BLK\_UNI\_VIS\_83.mes  
\* ftran\_RAMI4PILPSREF-OFC050\_MED\_UNI\_NIR\_27.mes  
\* ftran\_RAMI4PILPSREF-OFC050\_MED\_UNI\_NIR\_60.mes  
\* ftran\_RAMI4PILPSREF-OFC050\_MED\_UNI\_NIR\_83.mes  
\* ftran\_RAMI4PILPSREF-OFC050\_MED\_UNI\_VIS\_27.mes  
\* ftran\_RAMI4PILPSREF-OFC050\_MED\_UNI\_VIS\_60.mes  
\* ftran\_RAMI4PILPSREF-OFC050\_MED\_UNI\_VIS\_83.mes  
\* ftran\_RAMI4PILPSREF-OFC050\_SNW\_UNI\_NIR\_27.mes  
\* ftran\_RAMI4PILPSREF-OFC050\_SNW\_UNI\_NIR\_60.mes  
\* ftran\_RAMI4PILPSREF-OFC050\_SNW\_UNI\_NIR\_83.mes  
\* ftran\_RAMI4PILPSREF-OFC050\_SNW\_UNI\_VIS\_27.mes  
\* ftran\_RAMI4PILPSREF-OFC050\_SNW\_UNI\_VIS\_60.mes  
\* ftran\_RAMI4PILPSREF-OFC050\_SNW\_UNI\_VIS\_83.mes  
\* ftran\_RAMI4PILPSREF-OFC150\_BLK\_UNI\_NIR\_27.mes  
\* ftran\_RAMI4PILPSREF-OFC150\_BLK\_UNI\_NIR\_60.mes  
\* ftran\_RAMI4PILPSREF-OFC150\_BLK\_UNI\_NIR\_83.mes  
\* ftran\_RAMI4PILPSREF-OFC150\_BLK\_UNI\_VIS\_27.mes  
\* ftran\_RAMI4PILPSREF-OFC150\_BLK\_UNI\_VIS\_60.mes  
\* ftran\_RAMI4PILPSREF-OFC150\_BLK\_UNI\_VIS\_83.mes  
\* ftran\_RAMI4PILPSREF-OFC150\_MED\_UNI\_NIR\_27.mes  
\* ftran\_RAMI4PILPSREF-OFC150\_MED\_UNI\_NIR\_60.mes  
\* ftran\_RAMI4PILPSREF-OFC150\_MED\_UNI\_NIR\_83.mes  
\* ftran\_RAMI4PILPSREF-OFC150\_MED\_UNI\_VIS\_27.mes  
\* ftran\_RAMI4PILPSREF-OFC150\_MED\_UNI\_VIS\_60.mes  
\* ftran\_RAMI4PILPSREF-OFC150\_MED\_UNI\_VIS\_83.mes  
\* ftran\_RAMI4PILPSREF-OFC150\_SNW\_UNI\_NIR\_27.mes  
\* ftran\_RAMI4PILPSREF-OFC150\_SNW\_UNI\_NIR\_60.mes  
\* ftran\_RAMI4PILPSREF-OFC150\_SNW\_UNI\_NIR\_83.mes  
\* ftran\_RAMI4PILPSREF-OFC150\_SNW\_UNI\_VIS\_27.mes  
\* ftran\_RAMI4PILPSREF-OFC150\_SNW\_UNI\_VIS\_60.mes  
\* ftran\_RAMI4PILPSREF-OFC150\_SNW\_UNI\_VIS\_83.mes  
\* ftran\_RAMI4PILPSREF-OFC250\_BLK\_UNI\_NIR\_27.mes  
\* ftran\_RAMI4PILPSREF-OFC250\_BLK\_UNI\_NIR\_60.mes  
\* ftran\_RAMI4PILPSREF-OFC250\_BLK\_UNI\_NIR\_83.mes  
\* ftran\_RAMI4PILPSREF-OFC250\_BLK\_UNI\_VIS\_27.mes  
\* ftran\_RAMI4PILPSREF-OFC250\_BLK\_UNI\_VIS\_60.mes

\* ftran\_RAMI4PILPSREF-OFC250\_BLK\_UNI\_VIS\_83.mes  
\* ftran\_RAMI4PILPSREF-OFC250\_MED\_UNI\_NIR\_27.mes  
\* ftran\_RAMI4PILPSREF-OFC250\_MED\_UNI\_NIR\_60.mes  
\* ftran\_RAMI4PILPSREF-OFC250\_MED\_UNI\_NIR\_83.mes  
\* ftran\_RAMI4PILPSREF-OFC250\_MED\_UNI\_VIS\_27.mes  
\* ftran\_RAMI4PILPSREF-OFC250\_MED\_UNI\_VIS\_60.mes  
\* ftran\_RAMI4PILPSREF-OFC250\_MED\_UNI\_VIS\_83.mes  
\* ftran\_RAMI4PILPSREF-OFC250\_SNW\_UNI\_NIR\_27.mes  
\* ftran\_RAMI4PILPSREF-OFC250\_SNW\_UNI\_NIR\_60.mes  
\* ftran\_RAMI4PILPSREF-OFC250\_SNW\_UNI\_NIR\_83.mes  
\* ftran\_RAMI4PILPSREF-OFC250\_SNW\_UNI\_VIS\_27.mes  
\* ftran\_RAMI4PILPSREF-OFC250\_SNW\_UNI\_VIS\_60.mes  
\* ftran\_RAMI4PILPSREF-OFC250\_SNW\_UNI\_VIS\_83.mes  
\* ftran\_RAMI4PILPSREF-SHR025\_BLK\_UNI\_NIR\_27.mes  
\* ftran\_RAMI4PILPSREF-SHR025\_BLK\_UNI\_NIR\_60.mes  
\* ftran\_RAMI4PILPSREF-SHR025\_BLK\_UNI\_NIR\_83.mes  
\* ftran\_RAMI4PILPSREF-SHR025\_BLK\_UNI\_VIS\_27.mes  
\* ftran\_RAMI4PILPSREF-SHR025\_BLK\_UNI\_VIS\_60.mes  
\* ftran\_RAMI4PILPSREF-SHR025\_BLK\_UNI\_VIS\_83.mes  
\* ftran\_RAMI4PILPSREF-SHR025\_MED\_UNI\_NIR\_27.mes  
\* ftran\_RAMI4PILPSREF-SHR025\_MED\_UNI\_NIR\_60.mes  
\* ftran\_RAMI4PILPSREF-SHR025\_MED\_UNI\_NIR\_83.mes  
\* ftran\_RAMI4PILPSREF-SHR025\_MED\_UNI\_VIS\_27.mes  
\* ftran\_RAMI4PILPSREF-SHR025\_MED\_UNI\_VIS\_60.mes  
\* ftran\_RAMI4PILPSREF-SHR025\_MED\_UNI\_VIS\_83.mes  
\* ftran\_RAMI4PILPSREF-SHR025\_SNW\_UNI\_NIR\_27.mes  
\* ftran\_RAMI4PILPSREF-SHR025\_SNW\_UNI\_NIR\_60.mes  
\* ftran\_RAMI4PILPSREF-SHR025\_SNW\_UNI\_NIR\_83.mes  
\* ftran\_RAMI4PILPSREF-SHR025\_SNW\_UNI\_VIS\_27.mes  
\* ftran\_RAMI4PILPSREF-SHR025\_SNW\_UNI\_VIS\_60.mes  
\* ftran\_RAMI4PILPSREF-SHR025\_SNW\_UNI\_VIS\_83.mes  
\* ftran\_RAMI4PILPSREF-SHR050\_BLK\_UNI\_NIR\_27.mes  
\* ftran\_RAMI4PILPSREF-SHR050\_BLK\_UNI\_NIR\_60.mes  
\* ftran\_RAMI4PILPSREF-SHR050\_BLK\_UNI\_NIR\_83.mes  
\* ftran\_RAMI4PILPSREF-SHR050\_BLK\_UNI\_VIS\_27.mes  
\* ftran\_RAMI4PILPSREF-SHR050\_BLK\_UNI\_VIS\_60.mes  
\* ftran\_RAMI4PILPSREF-SHR050\_BLK\_UNI\_VIS\_83.mes  
\* ftran\_RAMI4PILPSREF-SHR050\_MED\_UNI\_NIR\_27.mes  
\* ftran\_RAMI4PILPSREF-SHR050\_MED\_UNI\_NIR\_60.mes  
\* ftran\_RAMI4PILPSREF-SHR050\_MED\_UNI\_NIR\_83.mes  
\* ftran\_RAMI4PILPSREF-SHR050\_MED\_UNI\_VIS\_27.mes  
\* ftran\_RAMI4PILPSREF-SHR050\_MED\_UNI\_VIS\_60.mes  
\* ftran\_RAMI4PILPSREF-SHR050\_MED\_UNI\_VIS\_83.mes  
\* ftran\_RAMI4PILPSREF-SHR050\_SNW\_UNI\_NIR\_27.mes  
\* ftran\_RAMI4PILPSREF-SHR050\_SNW\_UNI\_NIR\_60.mes  
\* ftran\_RAMI4PILPSREF-SHR050\_SNW\_UNI\_NIR\_83.mes  
\* ftran\_RAMI4PILPSREF-SHR050\_SNW\_UNI\_VIS\_27.mes

- \* ftran\_RAMI4PILPSREF-SHR050\_SNW\_UNI\_VIS\_60.mes
- \* ftran\_RAMI4PILPSREF-SHR050\_SNW\_UNI\_VIS\_83.mes
- \* ftran\_RAMI4PILPSREF-SHR100\_BLK\_UNI\_NIR\_27.mes
- \* ftran\_RAMI4PILPSREF-SHR100\_BLK\_UNI\_NIR\_60.mes
- \* ftran\_RAMI4PILPSREF-SHR100\_BLK\_UNI\_NIR\_83.mes
- \* ftran\_RAMI4PILPSREF-SHR100\_BLK\_UNI\_VIS\_27.mes
- \* ftran\_RAMI4PILPSREF-SHR100\_BLK\_UNI\_VIS\_60.mes
- \* ftran\_RAMI4PILPSREF-SHR100\_BLK\_UNI\_VIS\_83.mes
- \* ftran\_RAMI4PILPSREF-SHR100\_MED\_UNI\_NIR\_27.mes
- \* ftran\_RAMI4PILPSREF-SHR100\_MED\_UNI\_NIR\_60.mes
- \* ftran\_RAMI4PILPSREF-SHR100\_MED\_UNI\_NIR\_83.mes
- \* ftran\_RAMI4PILPSREF-SHR100\_MED\_UNI\_VIS\_27.mes
- \* ftran\_RAMI4PILPSREF-SHR100\_MED\_UNI\_VIS\_60.mes
- \* ftran\_RAMI4PILPSREF-SHR100\_MED\_UNI\_VIS\_83.mes
- \* ftran\_RAMI4PILPSREF-SHR100\_SNW\_UNI\_NIR\_27.mes
- \* ftran\_RAMI4PILPSREF-SHR100\_SNW\_UNI\_NIR\_60.mes
- \* ftran\_RAMI4PILPSREF-SHR100\_SNW\_UNI\_NIR\_83.mes
- \* ftran\_RAMI4PILPSREF-SHR100\_SNW\_UNI\_VIS\_27.mes
- \* ftran\_RAMI4PILPSREF-SHR100\_SNW\_UNI\_VIS\_60.mes
- \* ftran\_RAMI4PILPSREF-SHR100\_SNW\_UNI\_VIS\_83.mes
- README
- calc\_sw\_vegetation.m
- do\_all\_plots.m
- fast\_expm.m
- plot\_ref.m
- plot\_sw\_vegetation.m
- spartacus\_sw\_vegetation.m

The copyright of individual parts of the supplement might differ from the CC BY 4.0 License.
